# Supplementary material
Source: HighWire-hosted journal article supplement (https://spcare.bmj.com/content/bmjspcare-2015-000956)
Supplement: inline-supplementary-material-1 [file inline-supplementary-material-1.pdf]

## Appendix 1: MEDLINE [OVIDSP] search terms

- 1 palliative care/
- 2 terminal care/
- 3 hospice care/
- 4 Terminally Ill/
- 5 ((palliat\* or terminal) adj2 (care or therap\* or treatment\*)).tw.
- 6 (end of life or dying).tw.
- 7 ((terminal\* or final) adj (ill\* or sick\*)).tw.
- 8 terminal phase\*.tw.
- 9 or/1-8
- 10 Residential Facilities/
- 11 assisted living facilities/
- 12 homes for the aged/
- 13 exp nursing homes/
- 14 Hospices/
- 15 ((Nursing or care) adj home\*).tw.
- 16 old age home\*.tw.
- 17 (home\* adj3 (age\* or elder\*)).tw.
- 18 (aged care adj facilit\*).tw.
- 19 or/10-18
- 20 9 and 19
- 21 exp education professional/
- 22 exp educational measurement/
- 23 exp Inservice Training/
- 24 Competency-Based Education/
- 25 exp Credentialing/
- 26 exp professional competence/st
- 27 ((staff or nurse\* or doctor\* or profession\*) adj3 (training or education or course\* or accredit\*)).tw.
- 28 or/21-27
- 29 20 and 28
